# Supplementary material for: Estrogen receptor alpha drives proliferation in PTEN-deficient prostate carcinoma by stimulating survival signaling, MYC expression and altering glucose sensitivity
Source: PubMed Central journal article supplement (PMC4359242; doi:10.18632/oncotarget.2820), 2014-11-26
Supplement: oncotarget-06-604-s001.pdf [file oncotarget-06-604-s001.pdf]

# Estrogen receptor alpha drives proliferation in PTEN-deficient prostate carcinoma by stimulating survival signaling, MYC expression and altering glucose sensitivity

## Supplementary Material

### Supplemental Table 1

#### Percentage of cancer epithelial cells expressing ER $\alpha$ in human prostate cancer specimens

| Gleason Score | ER $\alpha$ <sup>#</sup> | AR   |
|---------------|--------------------------|------|
| 6             | 0                        | 90   |
| 6             | 0                        | N.D. |
| 6             | 0                        | 100  |
| 6             | 0                        | 100  |
| 6             | 0                        | 100  |
| 6             | 0                        | 100  |
| 6             | 0                        | 100  |
| 6             | 0                        | 90   |
| 6             | 0                        | N.D. |
| 6             | 0                        | 90   |
| 6             | 0                        | 90   |
| 6             | 0                        | 70   |
| 6             | 0                        | 100  |
| 6             | 0                        | 90   |
| 6             | 0                        | 90   |
| 9             | <b>70</b>                | 100  |
| 9             | <b>80</b>                | 100  |
| 9             | <b>20</b>                | 100  |
| 9             | 0                        | 80   |
| 9             | 0                        | N.D. |
| 9             | 0                        | N.D. |
| 9             | <b>10</b>                | 90   |
| 9             | <b>10</b>                | 90   |
| 9             | <b>&lt;10</b>            | 90   |
| 9             | 0                        | 90   |
| 9             | 0                        | 90   |
| 9             | <b>80</b>                | 90   |
| 9             | 0                        | 90   |
| 9             | 0                        | 90   |
| 9             | 0                        | 90   |
| 9             | 0                        | 90   |
| 9             | 0                        | 90   |
| 9             | 0                        | 80   |
| 9             | 0                        | 80   |
| 9             | <b>60</b>                | 90   |
| 9             | <b>30</b>                | 90   |
| 9             | <b>30</b>                | 90   |

N.D = Not detected due to poor staining or lack of tumour cells in the section

<sup>#</sup>*P*=0.001 significant correlation (*r*=0.524) between ER $\alpha$  positivity and Gleason score and *P*=0.002 significant correlation (*r*=0.502) between percentage of ER $\alpha$  positive cells and Gleason score (Spearman test, *n*=36).

No significant correlation between AR expression and Gleason score.

**Supplemental Table 2**

Primary antibodies used for immunohistochemistry (IHC) and western blotting (WB).

| Antigen                                      | Isotype           | Clone/ID  | Supplier                   | IHC concentration and conditions                               | WB concentration |
|----------------------------------------------|-------------------|-----------|----------------------------|----------------------------------------------------------------|------------------|
| Ki67                                         | Mouse IgG1        | MM1       | Novocastra                 | 1:400 <sup>(A)(2)</sup>                                        | -                |
| ER $\alpha$                                  | Mouse IgG1        | 6F11      | Novocastra                 | Mouse 1:300 <sup>(A)(2)</sup><br>Human 1:100 <sup>(A)(3)</sup> | 1:200            |
| ER $\beta$                                   | Mouse IgG1        | EMR02     | Novocastra                 | 1:300 <sup>(A)(3)</sup>                                        | -                |
| AR                                           | Rabbit polyclonal | #A9853    | Sigma Aldrich              | 2 $\mu$ g/mL <sup>(C)(4)</sup>                                 | -                |
| PTEN                                         | Rabbit IgG        | 138G6     | Cell Signalling Technology | 1:100 <sup>(B)(1)</sup>                                        | 1:1000           |
| Phospho-Akt (Ser473)                         | Rabbit IgG        | D9E       | Cell Signalling Technology | 1:100 <sup>(B)(1)</sup>                                        | 1:1000           |
| Akt                                          | Rabbit IgG        | C67E7     | Cell Signalling Technology | -                                                              | 1:1000           |
| Phospho-p70 S6 Kinase (Thr389)               | Rabbit polyclonal | #9205     | Cell Signalling Technology | -                                                              | 1:1000           |
| p70 S6 Kinase                                | Rabbit IgG        | 49D7      | Cell Signalling Technology | -                                                              | 1:2500           |
| Phospho-p44/42 MAPK (Erk1/2) (Thr202/Tyr204) | Rabbit IgG        | D13.14.4E | Cell Signalling Technology | -                                                              | 1:1000           |
| p44/42 MAPK (Erk1/2)                         | Rabbit IgG        | 137F5     | Cell Signalling Technology | -                                                              | 1:2500           |
| Phospho-Mnk1 (Thr197/202)                    | Rabbit polyclonal | #2111     | Cell Signalling Technology | -                                                              | 1:1000           |
| Mnk1                                         | Rabbit IgG        | C4C1      | Cell Signalling Technology | -                                                              | 1:1000           |
| Phospho-eIF4E (Ser209)                       | Rabbit IgG        | EP2151Y   | Abcam                      | -                                                              | 1:1000           |
| eIF4E                                        | Rabbit polyclonal | #9742     | Cell Signalling Technology | -                                                              | 1:3000           |
| MYC                                          | Rabbit IgG        | Y69       | Abcam                      | -                                                              | 1:2000           |
| Pan-actin                                    | Rabbit polyclonal | #4968     | Cell Signalling Technology | -                                                              | 1:1000           |

A – Bond<sup>TM</sup> epitope retrieval 2 (Leica)

B – Microwave antigen retrieval in Tris-EDTA (1 mM) pH 9.0 buffer

C – Bond<sup>TM</sup> epitope retrieval 1 (Leica)

1 – EnVision labelled polymer-HRP anti-rabbit with DAB substrate (DAKO)

2 – EnVision labelled polymer-HRP anti-mouse with DAB substrate (DAKO)

3 – BondRefine Detection kit (Leica)

4 – BondRefine Detection kit with rabbit secondary only (Leica)

### Supplemental Table 3

Primers used for quantitative RT-PCR.

| Transcript | Forward Primer (5'-3')            | Reverse Primer (5'-3')           | Ref               |
|------------|-----------------------------------|----------------------------------|-------------------|
| RPLPO      | GCGTGGCAATCCCTGACGCAC<br>CGCCG    | TGCGGATCTGCTGCATCTGCTTGGAGC      |                   |
| UBC        | CGTCGAGCCCAGTGTTACCAC<br>CAAGAAGG | CCCCATCACACCCAAGAACAAGCACA<br>AG | <a href="#">1</a> |
| HPRT1      | TGGCCGGCAGCGTTTCTGAG              | TCGCTAATCACGACGCTGGGAC           |                   |
| ESR1       | GGTCCTGCGAAGGCTGCAAGG             | TTCTCCCTCCTCGGCGGTCT             |                   |
| AR         | TTGGACAGTACCAGGGACCA              | CTTCTGTTTCCCTTCAGCGG             |                   |
| SLC2A1     | TGGCGGGAGACGCATAGTTA              | AACTCCTCAATAACCTTCTGGGG          |                   |
| HK2        | GGCTAGGAGCTACCACACAC              | AACTCGCCATGTTCTGTCCC             |                   |
| PFKL       | CGCTGCAATGGAGAGTTGTG              | CCTCAAAGACGTAGGCAGCA             |                   |
| PFKM       | ATCGTAGACGCCATCACCAC              | GACAAGGGCCAGGTATCCAC             |                   |
| PKM1       | GTCTGGAGAAACAGCCAAGG              | TCTTCAAACAGCAGACGGTG             | <a href="#">2</a> |
| PKM2       | GTCTGGAGAAACAGCCAAGG              | CGGAGTTCCTCGAATAGCTG             | <a href="#">2</a> |

1. Mamo S, Gal AB, Bodo S, Dinnyes A. Quantitative evaluation and selection of reference genes in mouse oocytes and embryos cultured in vivo and in vitro. *BMC Dev Biol* 2007;**7**: 14.

2. Israelsen WJ, Dayton TL, Davidson SM, Fiske BP, Hosios AM, Bellinger G, Li J, Yu Y, Sasaki M, Horner JW, Burga LN, Xie J, et al. PKM2 isoform-specific deletion reveals a differential requirement for pyruvate kinase in tumor cells. *Cell* 2013;**155**: 397-409.

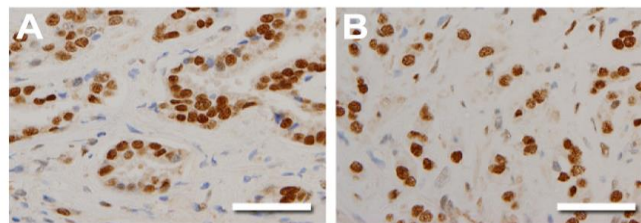

### Supplementary Figure 1: AR expression is maintained in human prostate cancer.

Representative images of AR staining in specimens of (A) Gleason score 6 and (B) Gleason score 9 human prostate cancer. Scale bars equal 50  $\mu$ m.

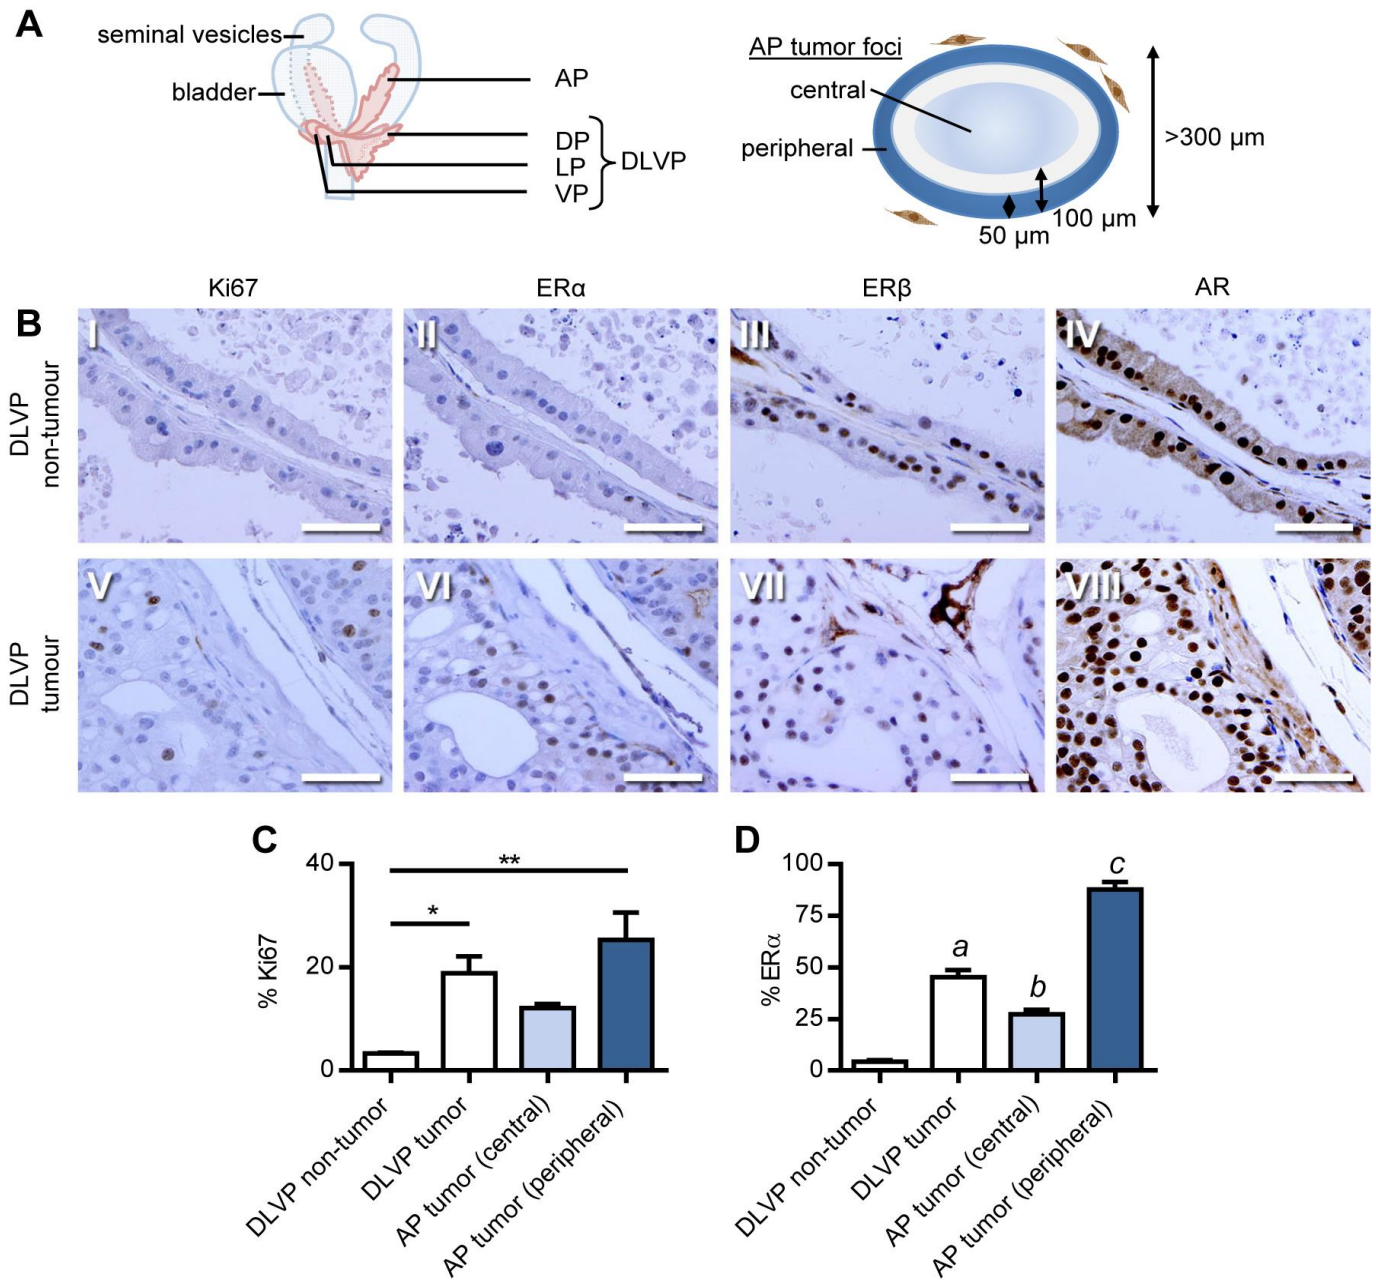

## Supplementary Figure 2

### Correlation between ERα and Ki67 in PTEN-null prostate cancer

(A) Schematic of mouse prostate and definition of central and peripheral regions in anterior prostate (AP) tumors. The dorsal, lateral and ventral prostate (DLVP) was divided into tumor and benign (non-tumor) regions. The AP has large malignant foci, but no benign glands, in 3 month old PTEN-null mice. Therefore, foci were divided into the Ki67-rich peripheral regions, within 50 μm of the stroma, and Ki67-low central regions, greater than 100 μm from the stroma. (B) Representative images of immunohistochemical staining of Ki67 (I, V), ERα (II, VI), ERβ (III, VII), and AR (IV, VIII), in DLVP non-tumor (I - IV) and DLVP tumor (V - VIII) regions. Scale bars = 50 μm. Average percentage of Ki67 (C) and ERα (D) positive cells in different regions of PTEN-null prostates (One way ANOVA, n=3 mice, \* $P < 0.05$ ; \*\* $P < 0.01$ ; a  $P < 0.001$  vs DLVP non-tumor,  $P < 0.01$  vs AP tumor-central; b  $P < 0.01$  vs DLVP non-tumor; c  $P < 0.001$  vs all groups).

**A****PTEN-deficient prostate cancer cells****Mouse embryonic fibroblasts**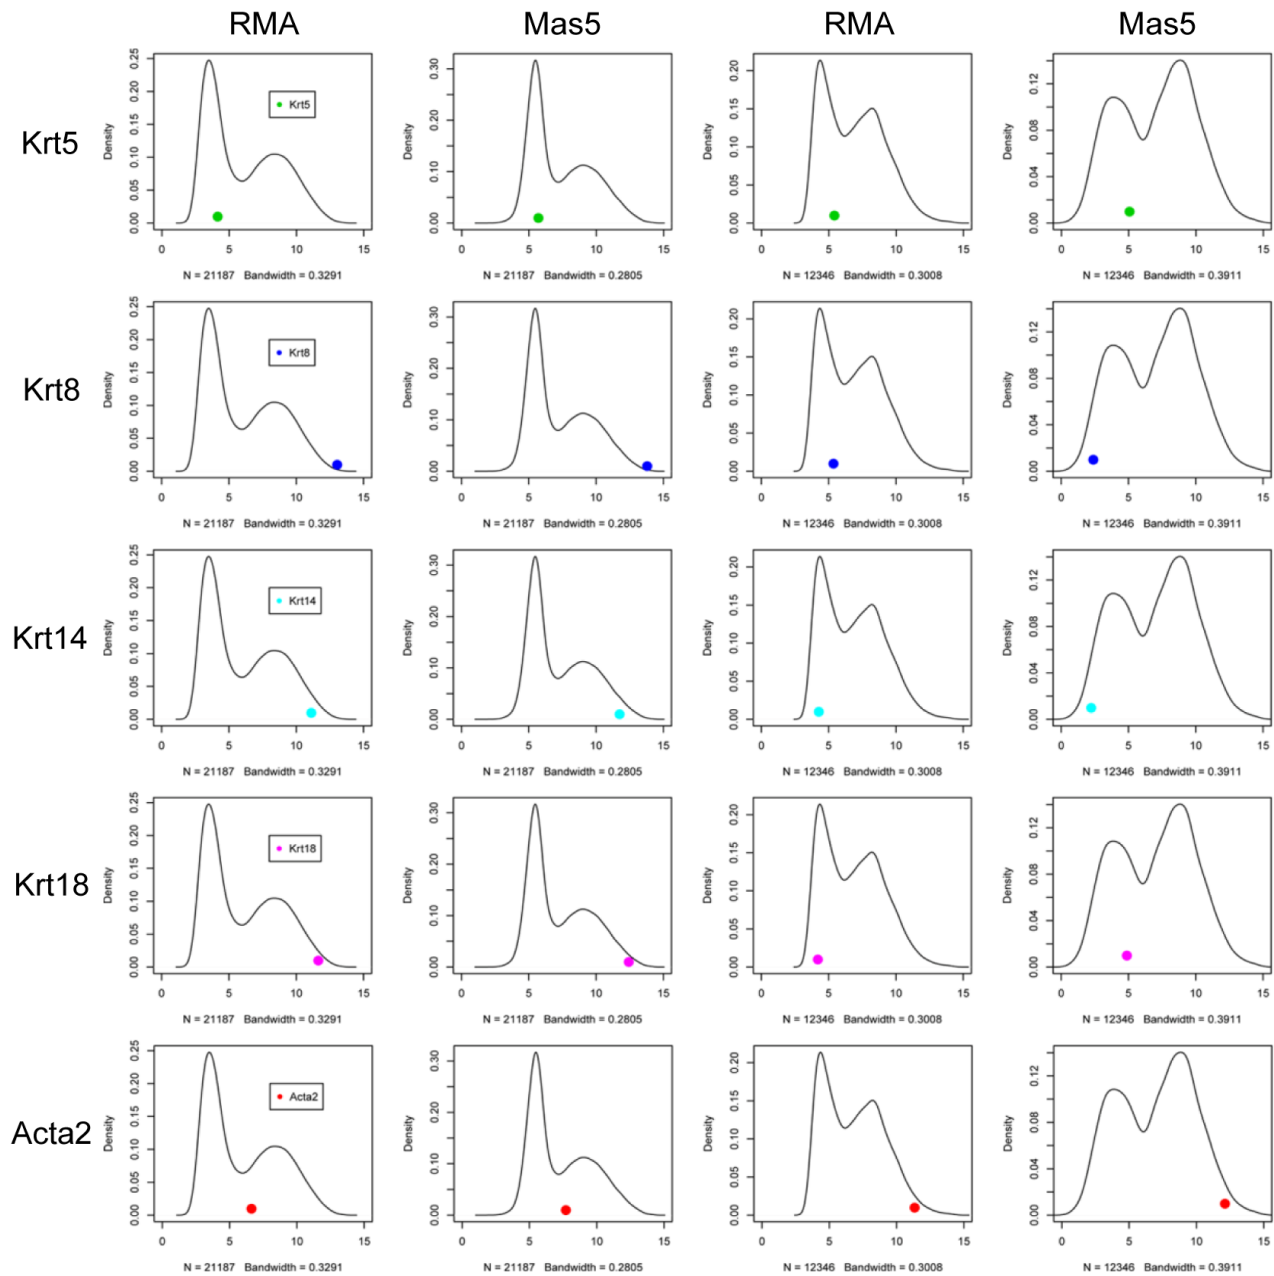**B**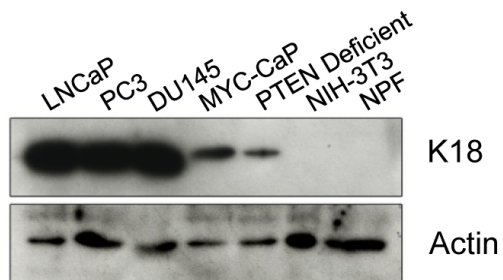

**Supplementary Figure 3: The PTEN-deficient prostate cancer cell line has an epithelial phenotype.** (A) Comparison of microarray data from the PTEN-deficient prostate cancer cells with a previously published dataset for mouse embryonic fibroblasts carrying a tet-inducible *Pten* transgene (GSE29010). Each dataset was normalised using two approaches, RMA and Mas5. Expression values form two distributions: non-expressed genes (left peak) and expressed genes (right peak). *Krt5* could not be detected in either cell type. *Krt8*, *Krt14* and *Krt18* are expressed in PTEN-deficient prostate cancer cells, but not fibroblasts. *Acta2* is highly expressed in fibroblasts, but not PTEN-deficient prostate cancer cells. (B) Western blot for keratin 18 in parental PTEN-deficient cells confirming their epithelial phenotype. Positive controls include human (LNCaP, PC3, DU145) and mouse (MYC-CaP) prostate cancer epithelial cells cells. Negative controls include mouse NIH-3T3 fibroblasts and human normal prostate fibroblasts (NPFs).

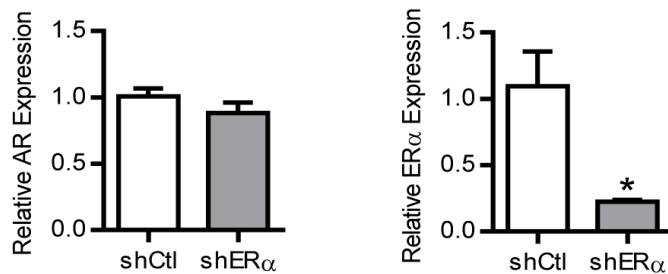

**Supplementary Figure 4: Expression of AR and ER $\alpha$  in PTEN-deficient cells.**

Relative expression of AR and ER $\alpha$  in shCtl and shER $\alpha$  PTEN deficient cells. Data represent average expression relative to shCtl cells with RPLPO as the reference gene (\* $P < 0.05$ , t test,  $n = 3$ ).

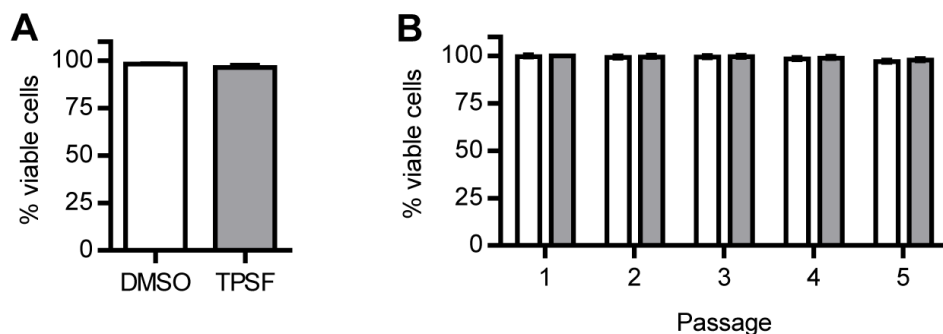

**Supplementary Figure 5: Stable knock down of shER $\alpha$  does not affect cell viability.**

(A) Average percentage of viable cells in parental PTEN-deficient cells treated with DMSO or TPSF. (B) Average percentage of viable cells in shCtl (white) and shER $\alpha$  (grey) cells cultured over 5 passages.

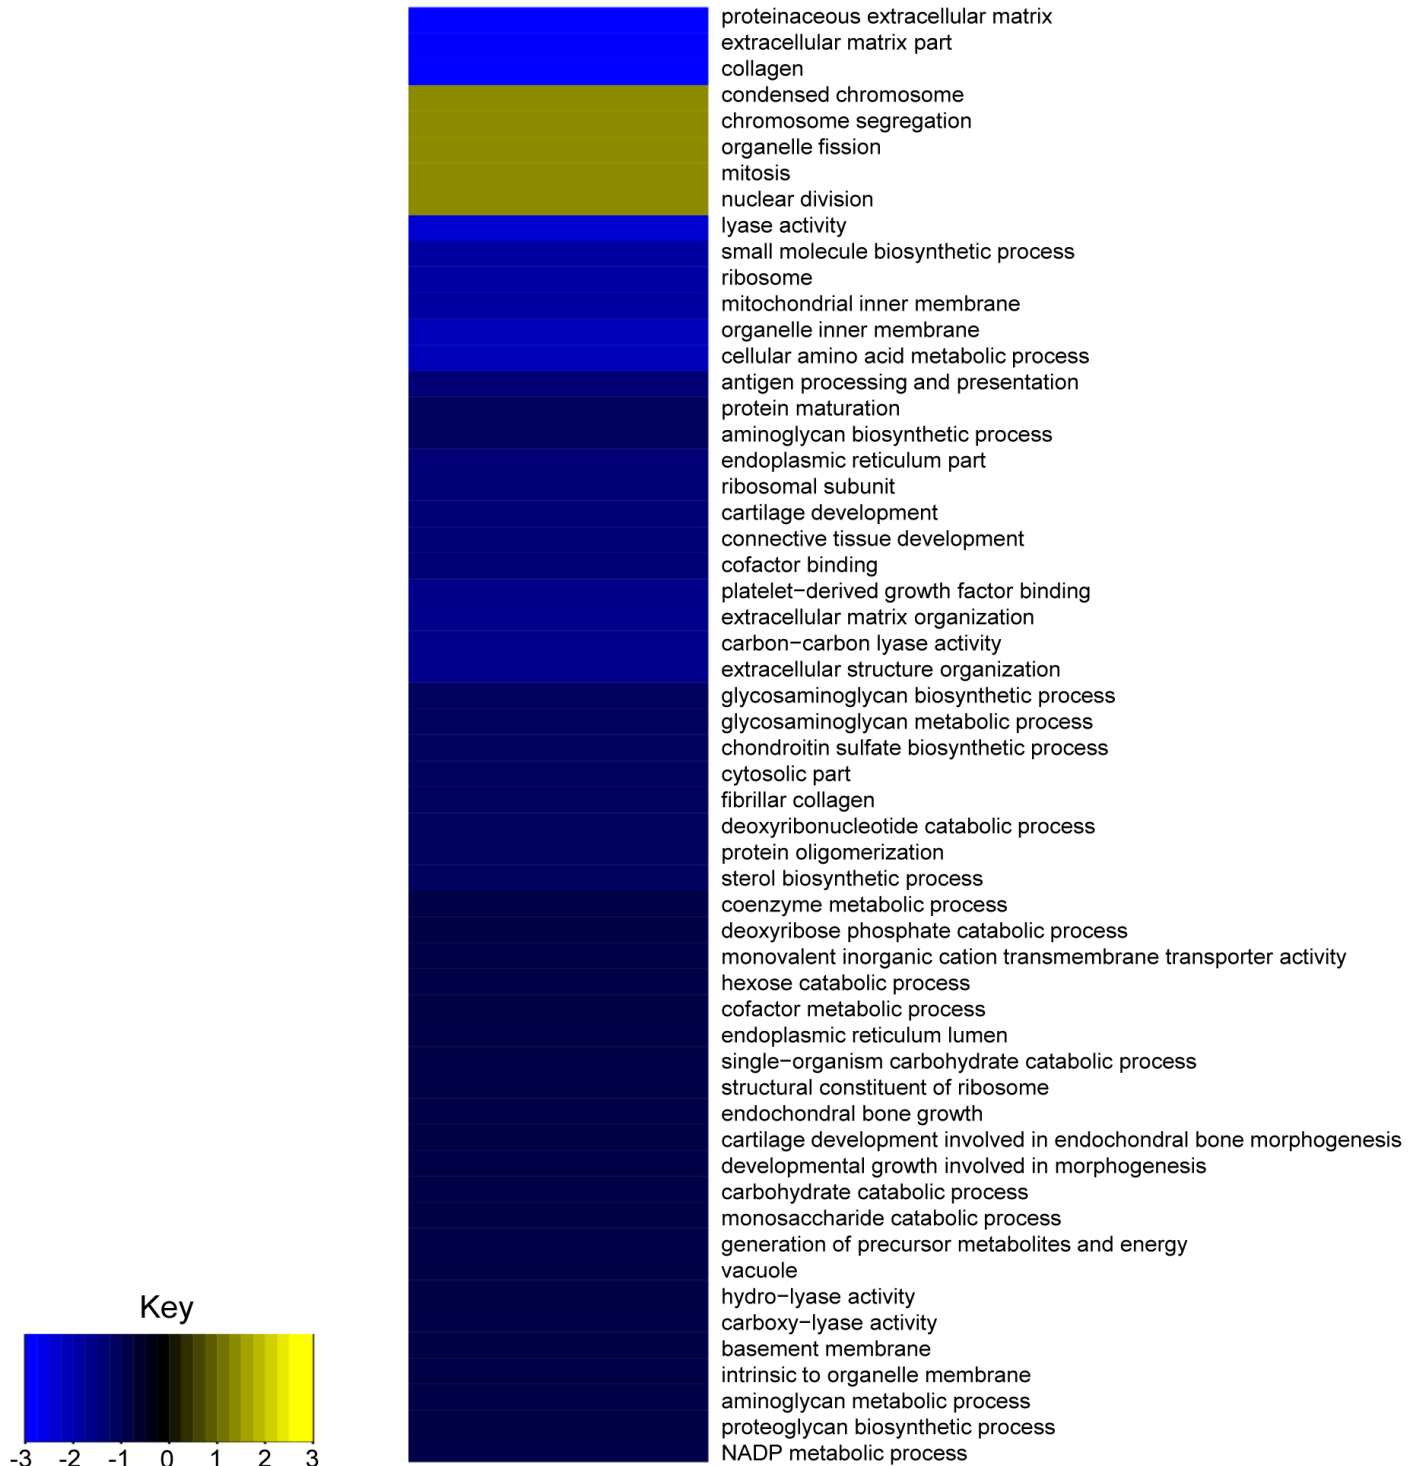

**Supplementary Figure 6**  
**Pathway analysis of differentially expressed genes between shCtl and shER $\alpha$  cells**

The color code represents  $-\log_{10}(\text{FDR})$  for enrichment of pathways among up (+ and yellow) or down (- and blue) regulated genes in shER $\alpha$  cells as compared to their control.
